# Supplementary material
Source: Springer Nature journal article supplement (https://www.springermedizin.de/resource/supplementary/12943_2007_307_MOESM3_ESM.pdf/9553890)

Control

TRAIL

Curcumin

Curcumin

+TRAIL

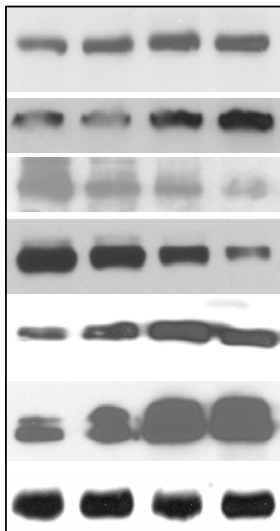

Bak

Bax

Bcl-2

Bcl-X<sub>L</sub>

DR4

DR5

β-actin

Supplement: MOESM3 [file 9553890]
